# Supplementary material for: Dietary supplementation with capsaicinoids alleviates obesity in mice fed a high-fat-high-fructose diet
Source: Royal Society of Chemistry journal article supplement (doi:10.1039/d4fo02102a), 2024-01-01
Supplement: d4fo02102a1.pdf [file d4fo02102a1.pdf]

## Supplementary Information

**Table S1** Primer sets used for quantitative PCR

| Target Gene    | Accession No.  | Sequence (5'→3')                                         |
|----------------|----------------|----------------------------------------------------------|
| PGC-1 $\alpha$ | NM_008904.3    | F: AGAGAGGCAGAAGCAGAAAGCAAT<br>R: ATTCTGTCCGCGTTGTGTCAGG |
| FAS            | NM_007988.3    | F: ACCTCTCCCAGGTGTGTGAC<br>R: CCTCCCGTACACTCACTCGT       |
| ACC            | NM_133360.3    | F: CTCTGCTAGAGCTGCAGGAT<br>R: CTGGGAAACTGACACAGGAC       |
| TRPV1          | NM_001001445.2 | F: CAACAAGAAGGGGCTTACACC<br>R: TCTGGAGAATGTAGGCCAAGAC    |
| $\beta$ -actin | NM_007393.5    | F: TGTCCACCTTCCAGCAGATGT<br>R: AGCTCAGTAACAGTCCGCCTAGA   |

**Table S2** Alpha diversity of gut microbiota

|          | LFD                | HFF                | LCP                | HCP                | p value |
|----------|--------------------|--------------------|--------------------|--------------------|---------|
| Ace      | 191.40 $\pm$ 16.81 | 199.84 $\pm$ 26.16 | 173.19 $\pm$ 16.16 | 167.48 $\pm$ 13.73 | 0.5891  |
| Chao1    | 191.14 $\pm$ 16.83 | 199.64 $\pm$ 25.85 | 172.86 $\pm$ 16.14 | 167.73 $\pm$ 13.27 | 0.5883  |
| Shannon  | 3.38 $\pm$ 0.20    | 3.26 $\pm$ 0.12    | 3.11 $\pm$ 0.22    | 2.99 $\pm$ 0.21    | 0.5052  |
| Simpson  | 0.11 $\pm$ 0.02    | 0.10 $\pm$ 0.01    | 0.13 $\pm$ 0.02    | 0.16 $\pm$ 0.03    | 0.3630  |
| Sobs     | 190.88 $\pm$ 16.89 | 196.88 $\pm$ 24.5  | 171.88 $\pm$ 16.14 | 166.13 $\pm$ 13.69 | 0.5876  |
| Coverage | 1.00 $\pm$ 0.00    | 1.00 $\pm$ 0.00    | 1.00 $\pm$ 0.00    | 1.00 $\pm$ 0.00    | 0.3449  |

LFD, low-fat diet; HFF, high-fat-high-fructose diet; LCP, HFF supplemented with 0.015% capsaicinoids; HCP, HFF supplemented with 0.045% capsaicinoids.
